# Supplementary material for: Value Placed on Comfort vs Life Prolongation Among Patients Treated With Maintenance Dialysis
Source: PubMed Central journal article supplement (PMC10043804; doi:10.1001/jamainternmed.2023.0265), 2023-03-27
Supplement: jamainternmed-e230265-s002.pdf [file jamainternmed-e230265-s002.pdf]

## Data Sharing Statement

Wong. Value Placed on Comfort vs Life Prolongation Among Patients Treated With Maintenance Dialysis. *JAMA Intern Med.* Published March 27, 2023.  
doi:10.1001/jamainternmed.2023.0265

### Data

**Data available:** No
